# Supplementary material for: Variation of peripheral blood-based biomarkers for response of anti-PD-1 immunotherapy in non-small-cell lung cancer
Source: Springer Nature journal article supplement (doi:10.1007/s12094-024-03416-5), 2024-03-07
Supplement: 12094_2024_3416_MOESM1_ESM.pdf [file 12094_2024_3416_MOESM1_ESM.pdf]

## **Supplementary Materials for**

# **Variation of Peripheral Blood-based Biomarkers for Response of Anti-PD-1 Immunotherapy in Non-Small-Cell Lung Cancer**

Xiaoming Wang, Dayu Chen, Yuyan Ma, Dongping Mo, Feng Yan\*

Department of Clinical Laboratory, Nanjing Medical University Affiliated Cancer Hospital & Jiangsu

Cancer Hospital & Jiangsu Institute of Cancer Research; Nanjing, 210009; Jiangsu, China

\*Corresponding author: Feng Yan, Department of Clinical Laboratory, Nanjing Medical University

Affiliated Cancer Hospital & Jiangsu Cancer Hospital & Jiangsu Institute of Cancer Research, Baizi Ting

No.42, Nanjing, Jiangsu 210009, China. Tel: +86-25-83286401; E-mail: [yanfeng@jszlyy.com.cn](mailto:yanfeng@jszlyy.com.cn)

**Methods 1.** Flow Cytometry

**Methods 2.** Computational Formula of accuracy, precision, recall, and f1 score

**Methods 3.** Treatment and Response Assessment

**Figure S1.** Immunotherapy drugs from 224 patients.

**Figure S2.** Predictive capacity of PD-L1 and TMB. (A, B) Kaplan–Meier curves for PFS of PD-L1 (A) and TMB (B). (C, D) Probability of clinical responses predicted by PD-L1 (C) and TMB (D).

**Figure S3.** Prediction of therapeutic responses (PD, SD, and PR) through clinical features and peripheral blood biomarkers by logistic regression (LR) model. (A) ROC curves of prediction model in the validation cohort. (B) Confusion matrix of prediction model in the validation cohort.

**Figure S4.** Prediction of therapeutic responses (PD, SD, and PR) through clinical features and peripheral blood biomarkers by random forest (RF). (A) ROC curves of prediction model in the validation cohort. (B) Confusion matrix of prediction model in the validation cohort.

**Figure S5.** Prediction of therapeutic responses (PD, SD, and PR) through clinical features and peripheral blood biomarkers by XGBoost. (A) ROC curves of prediction model in the validation cohort. (B) Confusion matrix of prediction model in the validation cohort.

**Figure S6.** Dynamic monitoring of PD-1 expression. Expression of CD3<sup>+</sup>PD-1<sup>+</sup> (A), CD4<sup>+</sup>PD-1<sup>+</sup> (B), and CD8<sup>+</sup>PD-1<sup>+</sup> (C) at different treatment cycle.

**Figure S7.** Role of certain immune cells. Expression of CD4/CD8 (A), LYM% (B), MON% (C), WBC (D), NLR (E) and MLR (F) in PD, SD, and PR groups.

**Figure S8.** Role of certain immune cells. Kaplan–Meier curves for PFS of average expression of CD4/CD8 (A), LYM% (B), MON% (C), WBC (D), NLR (E) and MLR (F) throughout treatment. The median of the expression is used as the cutoff criterion. The statistics do not include the results of the first treatment cycle.

**Figure S9.** Role of certain serum biochemical and immunological markers. Expression of TC (A), FT4 (B), CA125 (C), Urea (D), CA15-3 (E), TG (F), LDL-C (G) and UGA (H) in PD, SD, and PR groups.

**Figure S10.** Effect of clinical characteristics. Kaplan–Meier curves for PFS of different tumor types (A), immunotherapy drugs (B), age of SCC patients (C), and AC patients (D). The 60 years of age is used as the cutoff criterion.

**Figure S11.** Effect of patient's age and different immunotherapy drugs. (A) Kaplan–Meier curves for PFS of ages of patients. (B) Probability of clinical responses treated by Sintilimab, Tislelizumab, and Camrelizumab.

**Figure S12.** Effect of patient's age. Kaplan–Meier curves for PFS of ages of patients. The 60 years of age is used as the cutoff criterion.

**Table S1.** Clinical characteristics of patients.

**Table S2.** The 114 biomarkers in peripheral blood.

**Table S3.** Performances of LR, RF, XGBoost, and LightGBM models.

### **Methods 1. Flow Cytometry**

Peripheral blood mononuclear cells (PBMCs) were isolated and treated with antibodies after eliminating the red blood cells. Subsequently, the samples were assessed on an Agilent NovoCyte flow cytometer. To minimize inconsistencies in optics that may arise from day to day, the flow cytometer was calibrated using fluorescence beads before each experiment. This calibration process guaranteed that the measurement conditions were consistent across different samples. The operating procedures of the test kit are strictly following the instructions provided by Jiangxi Ceger Biotechnology Co., LTD.

### **Methods 2. Computational Formula of accuracy, precision, recall, and f1 score**

Accuracy means the percentage of samples that make the correct guess among all available samples.

$$\text{Accuracy} = \frac{\text{TP} + \text{TN}}{\text{TP} + \text{TN} + \text{FP} + \text{FN}} \times 100\%$$

Precision is defined as a corrective prediction in the positive class of samples.

$$\text{Precision} = \frac{\text{TP}}{\text{TP} + \text{FP}} \times 100\%$$

The recall is indicated how successfully positive states were predicted.

$$\text{Recall} = \frac{\text{TP}}{\text{TP} + \text{FN}} \times 100\%$$

F1 score takes into account both the precision and recall of classification model.

$$\text{f1 score} = 2 \times \frac{\text{Precision} \times \text{Recall}}{\text{Precision} + \text{Recall}}$$

In equations, a true positive (TP) occurs when the algorithm accurately predicts the patient's classification, whereas a false positive (FP) arises when the algorithm inaccurately predicts a patient's classification. A true negative (TN) occurs when the algorithm correctly predicts that a patient does not belong to a certain classification, and a false negative (FN) arises when the algorithm fails to predict that a patient belongs to a certain classification.

### **Methods 3. Treatment and Response Assessment**

To evaluate the efficacy of treatment, computed tomography or magnetic resonance imaging were utilized. The Response Evaluation Criteria in Solid Tumors (RECIST ver 1.1) was used to assess tumor response, which was then classified into one of four categories: complete response (CR), partial response (PR), stable disease (SD), or progressive disease (PD).

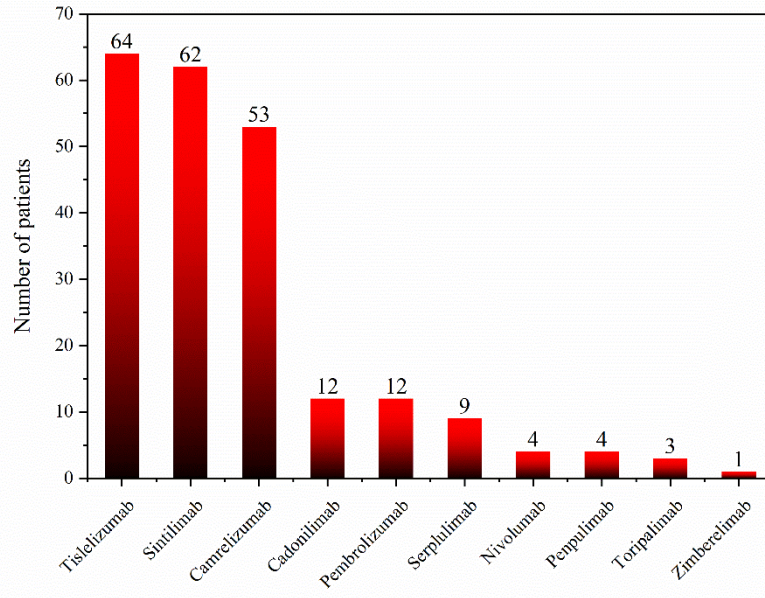

**Figure S1.** Immunotherapy drugs from 224 patients.

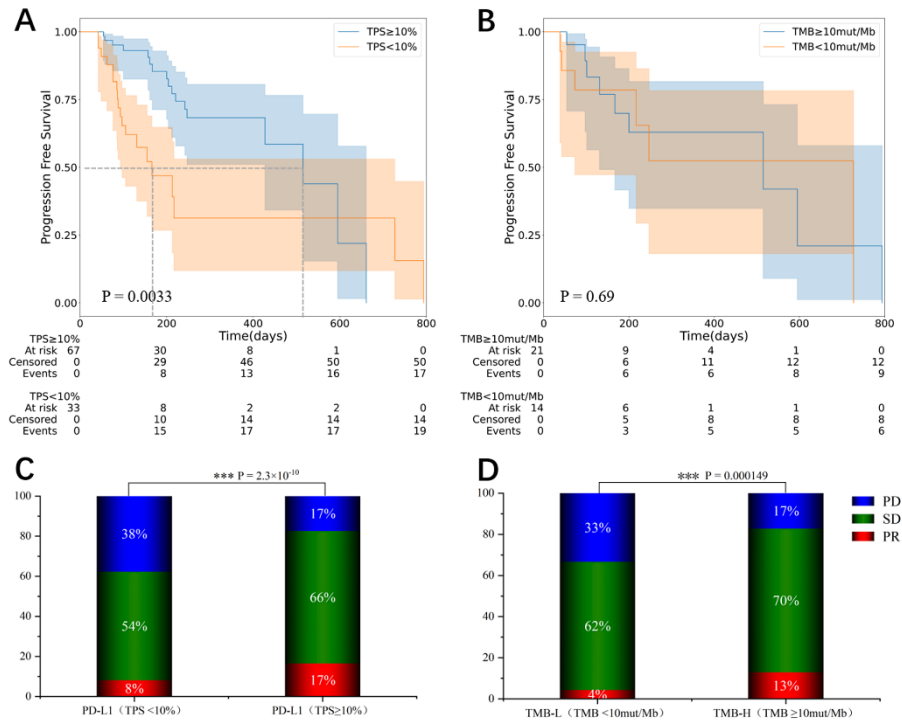

**Figure S2.** Predictive capacity of PD-L1 and TMB. (A, B) Kaplan–Meier curves for PFS of PD-L1 (A) and TMB (B). (C, D) Probability of clinical responses predicted by PD-L1 (C) and TMB (D).

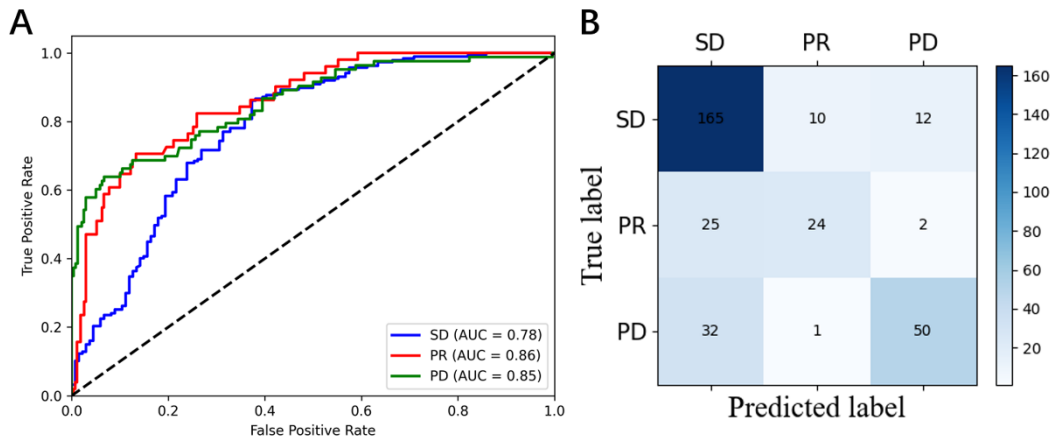

**Figure S3.** Prediction of therapeutic responses (PD, SD, and PR) through clinical features and peripheral blood biomarkers by logistic regression (LR) model. **(A)** ROC curves of prediction model in the validation cohort. **(B)** Confusion matrix of prediction model in the validation cohort.

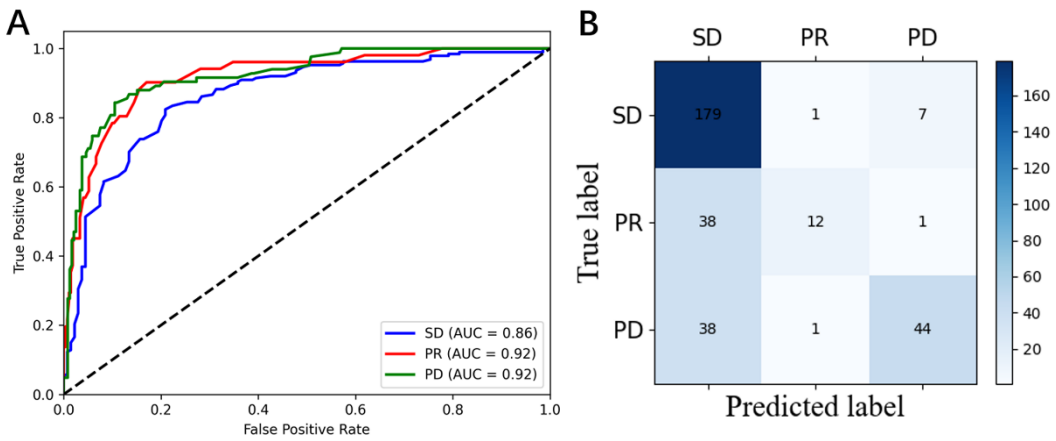

**Figure S4.** Prediction of therapeutic responses (PD, SD, and PR) through clinical features and peripheral blood biomarkers by random forest (RF). **(A)** ROC curves of prediction model in the validation cohort. **(B)** Confusion matrix of prediction model in the validation cohort.

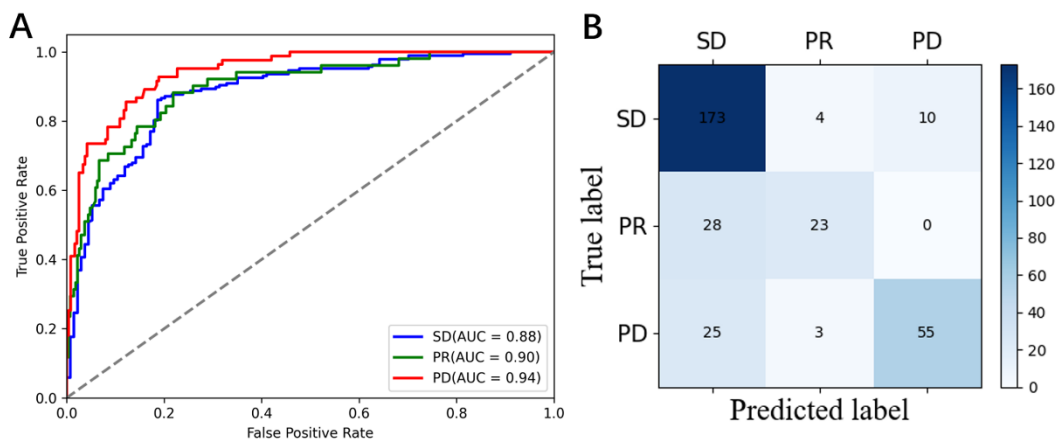

**Figure S5.** Prediction of therapeutic responses (PD, SD, and PR) through clinical features and peripheral blood biomarkers by XGBoost. **(A)** ROC curves of prediction model in the validation cohort. **(B)** Confusion matrix of prediction model in the validation cohort.

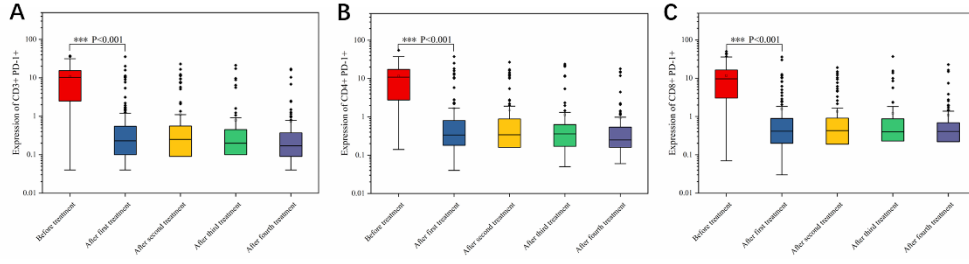

**Figure S6.** Dynamic monitoring of PD-1 expression. Expression of CD3<sup>+</sup>PD-1<sup>+</sup> (A), CD4<sup>+</sup>PD-1<sup>+</sup> (B), and CD8<sup>+</sup>PD-1<sup>+</sup> (C) at different treatment cycle.

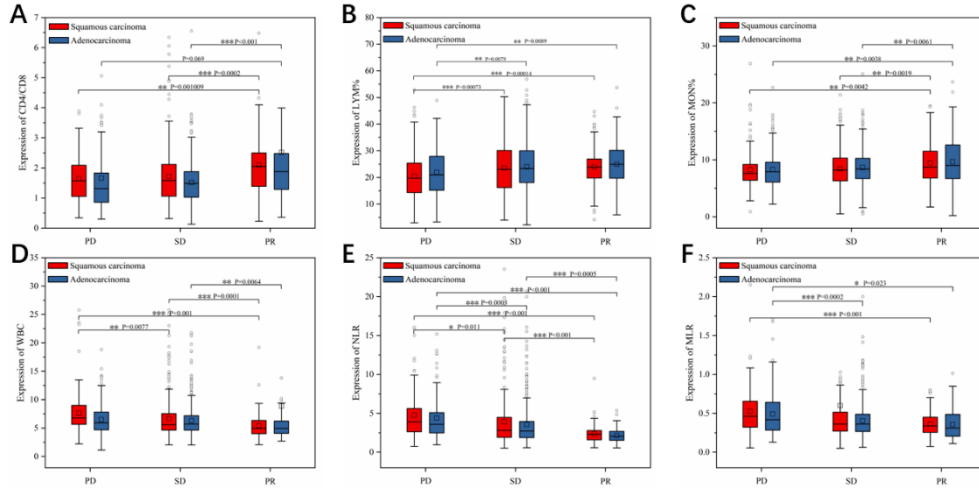

**Figure S7.** Role of certain immune cells. Expression of CD4/CD8 (A), LYM% (B), MON% (C), WBC (D), NLR (E) and MLR (F) in PD, SD, and PR groups.

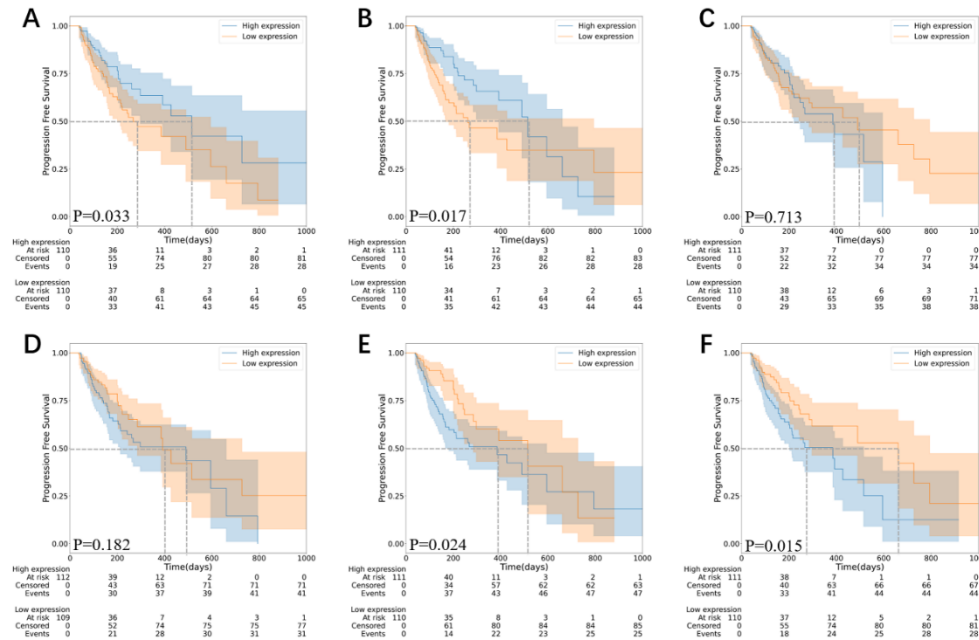

**Figure S8.** Role of certain immune cells. Kaplan–Meier curves for PFS of average expression of CD4/CD8 (A), LYM% (B), MON% (C), WBC (D), NLR (E) and MLR (F) throughout treatment. The median of the expression is used as the cutoff criterion. The statistics do not include the results of the first treatment cycle.

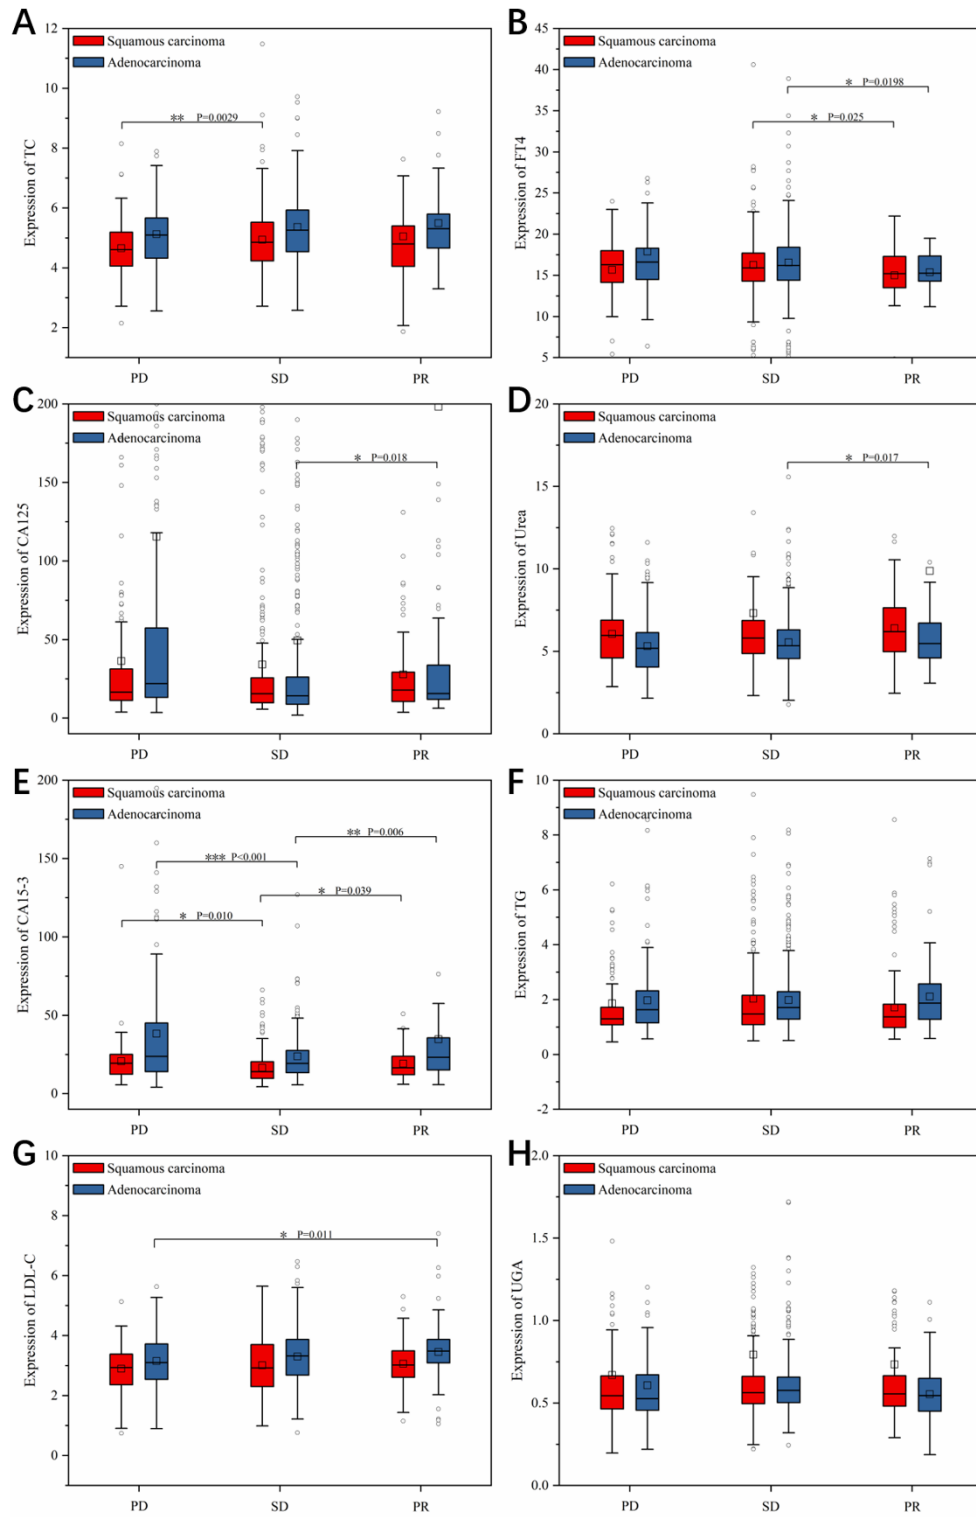

**Figure S9.** Role of certain serum biochemical and immunological markers. Expression of TC (A), FT4 (B), CA125 (C), Urea (D), CA15-3 (E), TG (F), LDL-C (G) and UGA (H) in PD, SD, and PR groups.

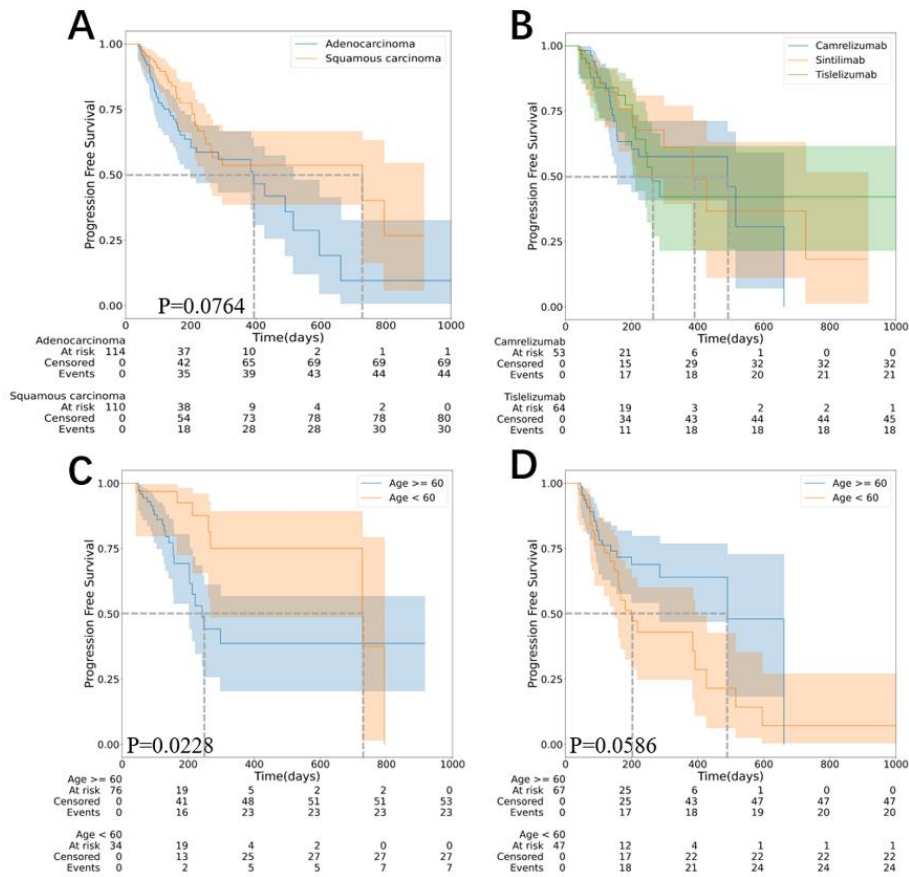

**Figure S10.** Effect of clinical characteristics. Kaplan–Meier curves for PFS of different tumor types (A), immunotherapy drugs (B), age of SCC patients (C), and AC patients (D). The 60 years of age is used as the cutoff criterion.

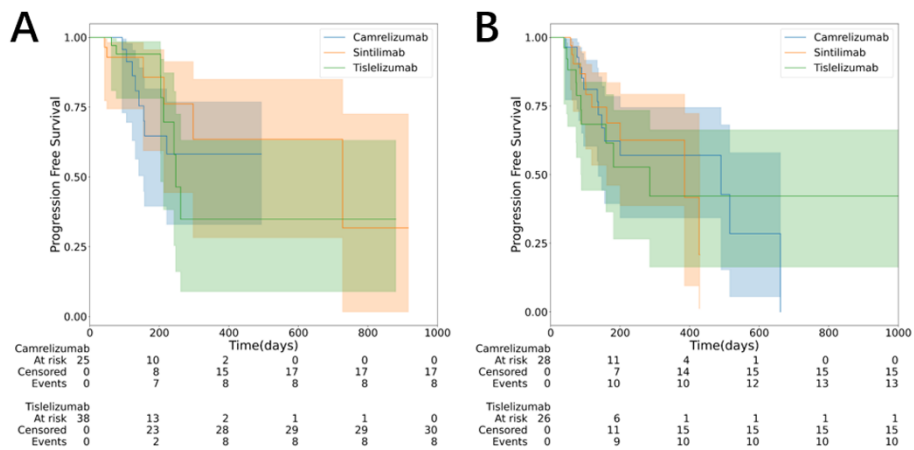

**Figure S11.** Effect of patient's age and different immunotherapy drugs. (A) Kaplan–Meier curves for PFS of ages of patients. (B) Probability of clinical responses treated by Sintilimab, Tislelizumab, and Camrelizumab.



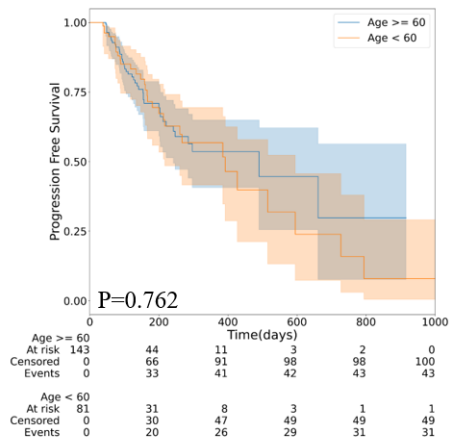

**Figure S12.** Effect of patient’s age. Kaplan–Meier curves for PFS of ages of patients. The 60 years of age is used as the cutoff criterion.

**Table S1.** Clinical characteristics of patients.

|    | Clinical characteristics                   | Numeralization                                                                                                                                                                               | Data sources    |
|----|--------------------------------------------|----------------------------------------------------------------------------------------------------------------------------------------------------------------------------------------------|-----------------|
| 1  | Age                                        | –                                                                                                                                                                                            | Medical history |
| 2  | Gender                                     | Male: 1; Female: 2                                                                                                                                                                           | Medical history |
| 3  | Tumor stage (T)                            | 0; 1; 2; 3; 4; x                                                                                                                                                                             | Medical history |
| 4  | Node stage (N)                             | 0; 1; 2; 3; x                                                                                                                                                                                | Medical history |
| 5  | Metastasis stage (M)                       | 0; 1; x                                                                                                                                                                                      | Medical history |
| 6  | Clinical stages                            | 1; 2; 3; 4; x                                                                                                                                                                                | Medical history |
| 7  | Differentiated degree                      | Moderate: 1; Moderate-poor: 0.5; Poor: 0; x                                                                                                                                                  | Medical history |
| 8  | Histologic type of tumor                   | Squamous: 1; Adenocarcinoma: 2                                                                                                                                                               | Medical history |
| 9  | Combined targeting therapy or not          | Yes: 1; No: 0                                                                                                                                                                                | Medical history |
| 10 | Whether prior radiotherapy or chemotherapy | Yes: 1; No: 0                                                                                                                                                                                | Medical history |
| 11 | Immunotherapy drugs                        | Tislelizumab: 2;<br>Sintilimab: 3;<br>Camrelizumab: 4;<br>Cadonilimab: 5;<br>Pembrolizumab: 6;<br>Serplulimab: 9;<br>Nivolumab: 7;<br>Penpulimab: 8;<br>Toripalimab: 12;<br>Zimberelimab: 10 | Medical history |

x: unknown

**Table S2.** The 114 biomarkers in peripheral blood.

|    | Biomarker name                               | Abbreviation                                          | Test method                 | Instrument       |
|----|----------------------------------------------|-------------------------------------------------------|-----------------------------|------------------|
| 1  | Percentage of total T cell                   | CD3 <sup>+</sup>                                      | Flow fluorescence           | Novocyte         |
| 2  | Percentage of help T cell                    | CD4 <sup>+</sup>                                      | Flow fluorescence           | Novocyte         |
| 3  | Percentage of cytotoxic T cell               | CD8 <sup>+</sup>                                      | Flow fluorescence           | Novocyte         |
| 4  | help T cell to cytotoxic T cell ratio        | CD4/CD8                                               | Calculation method          | Novocyte         |
| 5  | Expression rate of PD-1 on total T cell      | CD3 <sup>+</sup> PD-1 <sup>+</sup>                    | Flow fluorescence           | Novocyte         |
| 6  | Expression rate of PD-1 on help T cell       | CD4 <sup>+</sup> PD-1 <sup>+</sup>                    | Flow fluorescence           | Novocyte         |
| 7  | Expression rate of PD-1 on cytotoxic T cell  | CD8 <sup>+</sup> PD-1 <sup>+</sup>                    | Flow fluorescence           | Novocyte         |
| 8  | Percentage of double positive T cells        | CD3 <sup>+</sup> CD4 <sup>+</sup> CD8 <sup>+</sup>    | Flow fluorescence           | Novocyte         |
| 9  | Percentage of double negative T cells        | CD3 <sup>+</sup> CD4 <sup>-</sup> CD8 <sup>-</sup>    | Flow fluorescence           | Novocyte         |
| 10 | Concentration of plasma free DNA             | cfDNA                                                 | Flow fluorescence           | Luminex MAGPIX   |
| 11 | Ratio of primitive naive cells               | CD45dim                                               | Flow fluorescence           | BD FACS Canto II |
| 12 | Ratio of natural killer cell                 | CD3 <sup>+</sup> CD56 <sup>+</sup>                    | Flow fluorescence           | BD FACS Canto II |
| 13 | Ratio of B cell                              | CD19 <sup>+</sup>                                     | Flow fluorescence           | BD FACS Canto II |
| 14 | Ratio of natural killer T cell               | CD3 <sup>+</sup> CD56 <sup>+</sup>                    | Flow fluorescence           | BD FACS Canto II |
| 15 | Ratio of activated T cell                    | CD3 <sup>+</sup> /HLA-DR <sup>+</sup>                 | Flow fluorescence           | BD FACS Canto II |
| 16 | Ratio of T <sub>reg</sub> cells              | CD4 <sup>+</sup> CD25 <sup>+</sup> CD127 <sup>-</sup> | Flow fluorescence           | BD FACS Canto II |
| 17 | Ratio of T <sub>reg</sub> cells              | CD4 <sup>+</sup> CD25 <sup>+</sup>                    | Flow fluorescence           | BD FACS Canto II |
| 18 | White blood cell                             | WBC                                                   | Flow cytometry              | Sysmex XN        |
| 19 | Hemoglobin                                   | HGB                                                   | Flow cytometry              | Sysmex XN        |
| 20 | Red Blood Cell                               | RBC                                                   | Flow cytometry              | Sysmex XN        |
| 21 | Platelet                                     | PLT                                                   | Impedance method            | Sysmex XN        |
| 22 | hematocrit                                   | HCT                                                   | Total red blood cell volume | Sysmex XN        |
| 23 | Percentage of neutrophil                     | NEU%                                                  | Calculation method          | Sysmex XN        |
| 24 | Percentage of lymphocyte                     | LYM%                                                  | Calculation method          | Sysmex XN        |
| 25 | Percentage of monocyte                       | MON%                                                  | Calculation method          | Sysmex XN        |
| 26 | Percentage of eosinophils                    | EOS%                                                  | Calculation method          | Sysmex XN        |
| 27 | Percentage of basophils                      | BAS%                                                  | Calculation method          | Sysmex XN        |
| 28 | Neutrophil count                             | NEU#                                                  | Flow cytometry              | Sysmex XN        |
| 29 | Lymphocyte count                             | LYM#                                                  | Flow cytometry              | Sysmex XN        |
| 30 | Monocyte count                               | MON#                                                  | Flow cytometry              | Sysmex XN        |
| 31 | Eosinophils count                            | EOS#                                                  | Flow cytometry              | Sysmex XN        |
| 32 | Basophils count                              | BAS#                                                  | Flow cytometry              | Sysmex XN        |
| 33 | Plateletocrit                                | PCT_1                                                 | Calculation method          | Sysmex XN        |
| 34 | Percentage of reticulocytes                  | RET%                                                  | Calculation method          | Sysmex XN        |
| 35 | Reticulocytes                                | RET                                                   | Flow cytometry              | Sysmex XN        |
| 36 | Hypersensitive C-reactive protein            | hCRP                                                  | Immunoturbidimetric         | Sysmex XN        |
| 37 | Neutrophil-to-lymphocyte ratio               | NLR                                                   | NA                          | NA               |
| 38 | Neutrophil / (white blood cell - neutrophil) | dNLR                                                  | NA                          | NA               |
| 39 | Platelet-to-lymphocyte ratio                 | PLR                                                   | NA                          | NA               |
| 40 | Monocyte-to-lymphocyte ratio                 | MLR                                                   | NA                          | NA               |

|    |                                          |                     |                                  |             |
|----|------------------------------------------|---------------------|----------------------------------|-------------|
| 41 | Eosinophil-to-lymphocyte ratio           | ELR                 | NA                               | NA          |
| 42 | Urea                                     | Urea                | UV rate method                   | Cobas c702  |
| 43 | Creatinine                               | Cr                  | Jaffe's assay                    | Cobas c702  |
| 44 | Uric Acid                                | UA                  | Colorimetry                      | Cobas c702  |
| 45 | Glucose                                  | GLU                 | Hexokinase method                | Cobas c702  |
| 46 | Kalium                                   | K                   | Ion selective electrode method   | Cobas c702  |
| 47 | Sodium                                   | Na                  | Ion selective electrode method   | Cobas c702  |
| 48 | Chlorion                                 | Cl                  | Ion selective electrode method   | Cobas c702  |
| 49 | Calcium                                  | Ca                  | NM-BAPTA method                  | Cobas c702  |
| 50 | Phosphorus                               | P                   | UV endpoint method               | Cobas c702  |
| 51 | Magnesium                                | Mg                  | Colorimetry                      | Cobas c702  |
| 52 | Serum HCO <sub>3</sub> concentration     | HCO <sub>3</sub>    | Enzymic method                   | Cobas c702  |
| 53 | Total cholesterol                        | TC                  | Cholesterol oxidase method       | Cobas c702  |
| 54 | Triglyceride                             | TG                  | Enzymic method                   | Cobas c702  |
| 55 | High density lipoprotein cholesterol     | HDL-C               | Selective inhibition method      | Cobas c702  |
| 56 | Low density lipoprotein cholesterol      | LDL-C               | Soluble reaction method<br>(SOL) | Cobas c702  |
| 57 | Total bilirubin                          | TBIL                | Diazo method                     | Cobas c702  |
| 58 | Direct (binding) bilirubin               | DBIL                | Diazo method                     | Cobas c702  |
| 59 | Total protein                            | TP                  | Biuret method                    | Cobas c702  |
| 60 | Albumin                                  | ALB                 | Bromocresol green method         | Cobas c702  |
| 61 | Globulin                                 | GLB                 | Calculation method               | Cobas c702  |
| 62 | Albumin to globulin ratio                | A/G                 | Calculation method               | Cobas c702  |
| 63 | Alanine aminotransferase                 | ALT                 | Rate assay                       | Cobas c702  |
| 64 | γ-glutamyltranspeptidase                 | GGT                 | Rate assay                       | Cobas c702  |
| 65 | Alkaline phosphatase                     | ALP                 | Rate assay                       | Cobas c702  |
| 66 | Amylase                                  | AMY                 | Enzymic method                   | Cobas c702  |
| 67 | Lactic dehydrogenase                     | LDH                 | Rate assay                       | Cobas c702  |
| 68 | Aspartic transaminase                    | AST                 | Rate assay                       | Cobas c702  |
| 69 | Creatine kinase                          | CK                  | Rate assay                       | Cobas c702  |
| 70 | Hydroxybutyrate dehydrogenase            | HBDH                | Rate assay                       | Cobas c702  |
| 71 | Creatine kinase-MB subtype               | CK-MB               | Rate assay                       | Cobas c702  |
| 72 | Percentage of glycated albumin           | GA%                 | Enzymic method                   | Cobas c702  |
| 73 | Glycated albumin                         | UGA                 | Enzymic method                   | Cobas c702  |
| 74 | Urine microalbumin                       | UALB                | Immunoturbidimetric              | Cobas c702  |
| 75 | β <sub>2</sub> -microglobulin            | B <sub>2</sub> -MG  | Immunoturbidimetric              | Cobas c702  |
| 76 | Glutathione reductase                    | GR                  | Enzymic method                   | Cobas c702  |
| 77 | Thymidine kinase 1                       | TK1                 | Chemiluminescence                | CIS_2       |
| 78 | Lipoprotein phospholipase A <sub>2</sub> | LP-PLA <sub>2</sub> | Chemiluminescence                | UPT-3A      |
| 79 | Thioredoxin                              | TR                  | Chemiluminescence                | TZD-CL-200E |
| 80 | Vascular endothelial growth factor       | VEGF                | Chemiluminescence                | TZD-CL-200E |
| 81 | B-natriuretic peptide                    | BNP                 | Chemiluminescence                | NRM 411     |
| 82 | B-natriuretic peptide precursor          | pro-BNP             | Chemiluminescence                | Cobas e801  |

|     |                                          |                     |                   |            |
|-----|------------------------------------------|---------------------|-------------------|------------|
| 83  | Carbohydrate antigen 242                 | CA242               | Chemiluminescence | Cobas e801 |
| 84  | Carbohydrate antigen 50                  | CA50                | Chemiluminescence | Cobas e801 |
| 85  | Carcinoembryonic antigen                 | CEA                 | Chemiluminescence | Cobas e801 |
| 86  | Change rate of carcinoembryonic antigen  | $\Delta$ CEA%       | NA                | NA         |
| 87  | Carbohydrate antigen 72-4                | CA72-4              | Chemiluminescence | Cobas e801 |
| 88  | Change rate of carbohydrate antigen 72-4 | $\Delta$ CA72-4%    | NA                | NA         |
| 89  | Carbohydrate antigen 125                 | CA125               | Chemiluminescence | Cobas e801 |
| 90  | Change rate of carbohydrate antigen 125  | $\Delta$ CA125%     | NA                | NA         |
| 91  | Carbohydrate antigen 15-3                | CA15-3              | Chemiluminescence | Cobas e801 |
| 92  | Change rate of carbohydrate antigen 15-3 | $\Delta$ CA15-3%    | NA                | NA         |
| 93  | Carbohydrate antigen 19-9                | CA19-9              | Chemiluminescence | Cobas e801 |
| 94  | Change rate of carbohydrate antigen 19-9 | $\Delta$ CA19-9%    | NA                | NA         |
| 95  | Alpha fetoprotein                        | AFP                 | Chemiluminescence | Cobas e801 |
| 96  | Change rate of alpha fetoprotein         | $\Delta$ AFP%       | NA                | NA         |
| 97  | Neuron-specific enolase                  | NSE                 | Chemiluminescence | Cobas e801 |
| 98  | Change rate of neuron-specific enolase   | $\Delta$ NSE%       | NA                | NA         |
| 99  | Cytokeratin 19 fragment                  | CYFRA21-1           | Chemiluminescence | Cobas e801 |
| 100 | Change rate of cytokeratin 19 fragment   | $\Delta$ CYFRA21-1% | NA                | NA         |
| 101 | Procalcitonin                            | PCT_2               | Chemiluminescence | Cobas e801 |
| 102 | Troponin T                               | TnT                 | Chemiluminescence | Cobas e801 |
| 103 | Squamous cell carcinoma antigen          | SCC                 | Chemiluminescence | Cobas e801 |
| 104 | Adrenocorticotrophic hormone             | ACTH                | Chemiluminescence | Cobas e801 |
| 105 | Cortisol                                 | Cort                | Chemiluminescence | Cobas e801 |
| 106 | Triiodothyronine                         | T3                  | Chemiluminescence | Cobas e801 |
| 107 | Thyroxine                                | T4                  | Chemiluminescence | Cobas e801 |
| 108 | Free triiodothyronine                    | FT3                 | Chemiluminescence | Cobas e801 |
| 109 | Free thyroxine                           | FT4                 | Chemiluminescence | Cobas e801 |
| 110 | Thyroid stimulating hormone              | TSH                 | Chemiluminescence | Cobas e801 |
| 111 | Thyroglobulin                            | TG                  | Chemiluminescence | Cobas e801 |
| 112 | Antithyroglobulin antibody               | TGAb                | Chemiluminescence | Cobas e801 |
| 113 | Anti-thyroid peroxidase antibody         | TPOAb               | Chemiluminescence | Cobas e801 |
| 114 | Parathyroid hormone                      | PTH                 | Chemiluminescence | Cobas e801 |

**Table S3.** Performances of LR, RF, XGBoost, and LightGBM models.

|           | LR     | RF     | XGBoost | LightGBM |
|-----------|--------|--------|---------|----------|
| Accuracy  | 74.45% | 73.21% | 78.19%  | 79.75%   |
| Precision | 73.67% | 80.18% | 79.28%  | 81.64%   |
| Recall    | 65.18% | 57.42% | 67.96%  | 70.95%   |
| F1 Score  | 68.18% | 61.03% | 71.63%  | 74.58%   |
| AUC of PD | 0.85   | 0.92   | 0.94    | 0.94     |
| AUC of SD | 0.78   | 0.86   | 0.88    | 0.89     |
| AUC of PR | 0.86   | 0.92   | 0.90    | 0.91     |
